# Supplementary material for: In vitro reconstitution reveals major differences between human and bacterial cytochrome c synthases
Source: eLife. 2021 May 11;10:e64891. doi: 10.7554/eLife.64891 (PMC8112865; doi:10.7554/eLife.64891)
Supplement: Figure 3—figure supplement 1—source data 1. [file elife-64891-fig3-figsupp1-data1.xlsx]

## Sheet: NormalizedData
Figure 3 - Figure Supplement 1C Quant
IMAGE J Pixel Analysis of Heme Stained Bands
		Raw Image J Band Density				Normalized densities (normalized to 20mer in each data set)				Presented Data
	Trial:	HCCS 11-26;12-3-19	HCCS 12-12-19	HCCS12-20-19		HCCS 11-26;12-3-19	HCCS 12-12-19	HCCS12-20-19		Average Normalized Image J Density	StandardDev	1/2 Standard Dev
Substrate
cytc		25183	11992	26982		0.913984	0.518237	0.619507		0.683909	0.205584	0.102792
56-mer		33108	17650	36165		1.20161	0.762748	0.830349		0.931569	0.236293	0.118147
20-mer		27553	23140	43554		1	1	1		1	0	0
11-mer		1669	5578	8126		0.0605742	0.241054	0.186573		0.162734	0.0925717	0.0462858
9-mer		2130	5294	7562		0.0773056	0.228781	0.173624		0.159903	0.0766643	0.0383321
20mer K->D		1759	4162	6022		0.0638406	0.179862	0.138265		0.127322	0.0587795	0.0293898
20mer		15545	22144	27622		1	1	1		1	0	0
H19A		667	7902	3659		0.0429077	0.356846	0.132467		0.177407	0.161722	0.080861
H19K		358	7797	3346		0.0230299	0.352104	0.121135		0.165423	0.168948	0.0844742
H19M		1287	7849	8199		0.0827919	0.354453	0.296829		0.244691	0.143139	0.0715693
