# Supplementary material for: In vitro reconstitution reveals major differences between human and bacterial cytochrome c synthases
Source: eLife. 2021 May 11;10:e64891. doi: 10.7554/eLife.64891 (PMC8112865; doi:10.7554/eLife.64891)
Supplement: Figure 3—figure supplement 3—source data 1. [file elife-64891-fig3-figsupp3-data1.xlsx]

## Sheet: Average&StandardDeviationCalcs
Figure 2C, Figure 3 - Figure Supplement 3D, Figure 4C Summary of Percent Released Substrate
Note - Data is summarized in Figure 3 - Figure Supplment 3D and key data is presented in Figure 2C or Figure 4C
Presented in:	Figure 2C, Figure 3-FigSupp3D	Figure 4C, Figure 3-FigSupp3D	Figure 3-FigSupp3D
exp #	Full length Cyt c	Cyt c 20mer	Cyt c SXXCH 20mer
	% Released	% Released	% Released
1	68	17.0308	6.87367
2	59	9.42415	3.48257
3	59	14.8598	4.77225
4		16.0647	2.13675
5		16.5719	7.42802
6		13.7665
7		8.78447
Average % of Released Substrate	62	13.786	4.93865
Standard Deviation	5.19615	3.38322	2.2327

## Sheet: CytcReleaseImageJAnalysis
Figure 2C - Horse heart cytochrome c release analysis
IMAGE J Pixel Analysis of Heme Stained Bands
% Released calculated based on the amount of substrate in the supernatant compared to the total amount of cyt c
	Image J Density	Image J Density	Image J Density
	exp1	exp2	exp3
Total Supernatant*	70857.5	61535.8	10039.4
Total Matured Cyt c*	103820	104799	17018
Fraction Released	0.682505	0.587181	0.589929
% Released	68.2505	58.7181	58.9929
Average % Released	61.9872
Standard Deviation	5.42596
*Note - Multiple heme signal pixel densities were use to determine the total superantant and total matured substrate values.
For simplicity, we have chosen to present the total band intensities from these methods as a single value.

## Sheet: 20merReleaseImageJAnalysis
Figure 4C - 20mer peptide release analysis
IMAGE J Pixel Analysis of Heme Stained Bands
% Released calculated based on the amount of substrate in the supernatant compared to the total amount of peptide
	Image J Density	Image J Density	Image J Density	Image J Density	Image J Density	Image J Density	Image J Density
	exp1	exp2	exp3	exp4	exp5	exp6	exp7
Total Supernatant*	19251	9101	42010	25507.5	15887	15143.3	10597
Total Matured 20mer*	113037	96571.1	282709	158780	95867.3	110001	120633
Fraction Released	0.170308	0.0942415	0.148598	0.160647	0.165719	0.137665	0.0878447
% Released	17.0308	9.42415	14.8598	16.0647	16.5719	13.7665	8.78447
Average % released	13.786
Standard Deviation	3.38322
*Note - the heme signal remaining on the glutathione agarose beads of heme-attached peptides (HCCS-bound) were sometimes saturated, thus leading to
an overestimate of the released amount: signals from the heme-attached peptides (beads) were at much higher levels than the full cyt c (beads), with cyt c released
into the supernatant at higher levels than peptides. Spectral analyses discussed in the text confirm this. We thus used multiple heme signal pixel densities
including an elution from the beads to determine the total supernatant and total matured substrate values (of heme-attached peptides), all resulting in similar release levels. These data are presented as a single value for the total supernatant and the total matured substrate respectively to provide clarity.

## Sheet: SXXCHReleaseImageJAnalysis
Figure 3 - Figure Supplement 3D SXXCH 20mer peptide release analysis
IMAGE J Pixel Analysis of Heme Stained Bands
% Released calculated based on the amount of substrate in the supernatant compared to the total amount of peptide
	Image J Density	Image J Density	Image J Density	Image J Density	Image J Density
	exp1	exp2	exp3	exp4	exp5
Total Supernatant*	3440	1679.09	2710.42	1258.8	4004
Total Matured SXXCH 20mer*	50052.4	48214	56795.5	58911.8	53904
Fraction Released	0.0687279	0.0348257	0.0477225	0.0213675	0.0742802
% released	6.87279	3.48257	4.77225	2.13675	7.42802
Average % released	4.93848
Standard Deviation	2.23251
*Note - the heme signal remaining on the glutathione agarose beads of heme-attached peptides (HCCS-bound) were sometimes saturated,
thus leading to an overestimate of the released amount: signals from the heme-attached peptides (beads) were at much higher levels than
the full cyt c (beads), with cyt c released into the supernatant at higher levels than peptides. Spectral analyses discussed in the text confirm this.
We thus used multiple heme signal pixel densities to determine the total supernatant and total matured substrate values (of heme-attached peptides), all resulting in similar release levels. These data are presented as a single value for the total supernatant and the total matured
substrate respectively to provide clarity.
