# Supplementary material for: In vitro reconstitution reveals major differences between human and bacterial cytochrome c synthases
Source: eLife. 2021 May 11;10:e64891. doi: 10.7554/eLife.64891 (PMC8112865; doi:10.7554/eLife.64891)
Supplement: Figure 7—figure supplement 1—source data 1. [file elife-64891-fig7-figsupp1-data1.xlsx]

## Sheet: NormalizedData
Figure 7 - Figure Supplement 1C Quant
IMAGE J Pixel Analysis of Heme Stained Bands
		Raw Image J Band Density				Normalized densities (normalized to 20mer in each data set)				Presented Data
	Trial:	CcsBA 12-5-19	CcsBA 12-9-19	CcsBA 12-23-19		CcsBA 12-5-19	CcsBA 12-9-19	CcsBA 12-23-19		Average Normalized Image J Density	StandardDev	1/2 Standard Dev
Substrate
cytc		17155	14815	14435		0.702009	0.577921	0.858766		0.712899	0.140739	0.0703695
56-mer		17614	20693	20302		0.720792	0.807217	1.20781		0.911938	0.259847	0.129923
20-mer		24437	25635	16809		1	1	1		1	0	0
11-mer		20783	16773	19244		0.850473	0.654301	1.14486		0.883212	0.246914	0.123457
9-mer		22425	12154	15005		0.917666	0.474117	0.892677		0.761487	0.249182	0.124591
20mer K->D		4676	3661	2845		0.191349	0.142813	0.169255		0.167805	0.0243007	0.0121504
20mer		15224	22682	22141		1	1	1		1	0	0
H19A		994	2730	2552		0.0652916	0.12036	0.115261		0.100304	0.0304288	0.0152144
H19K		1335	2610	3259		0.0876905	0.115069	0.147193		0.116651	0.0297828	0.0148914
H19M		1774	455	2619		0.116527	0.02006	0.118287		0.0849579	0.0562102	0.0281051
